# Supplementary material
Source: Springer Nature journal article supplement (https://www.springermedizin.de/resource/supplementary/12950_2014_365_MOESM3_ESM.pdf/9557668)

**A**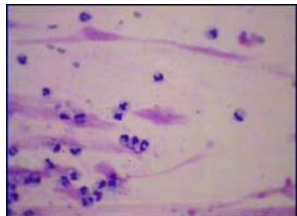

ARDS

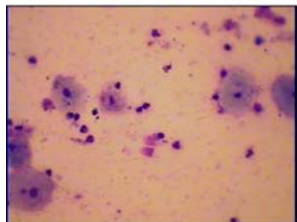

TB

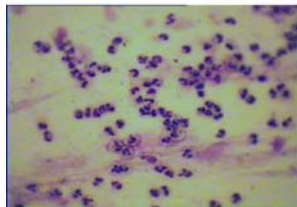

ARDS+TB

**B**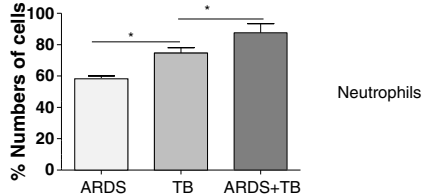

Neutrophils

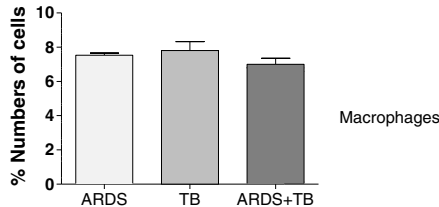

Macrophages

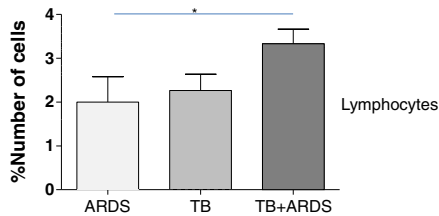

Lymphocytes

Supplement: MOESM3 [file 9557668]
